# Interpreting Inverse Correlation Time: from Blood flow to Vascular Network

Qingwei Fang<sup>a</sup>, Chakameh Z. Jafari<sup>b</sup>, Shaun Engelmann<sup>a</sup>, Alankrit Tomar<sup>b</sup>,  
Andrew K. Dunn<sup>a,b,c</sup>

<sup>a</sup>*Department of Biomedical Engineering, The University of Texas at  
Austin, Austin, 78712, TX, US*

<sup>b</sup>*Department of Electrical and Computer Engineering, The University of Texas at  
Austin, Austin, 78712, TX, US*

<sup>c</sup>*Correspondence: [adunn@utexas.edu](mailto:adunn@utexas.edu)*

---

## Abstract

1 The inverse correlation time (ICT) is a key quantity in laser speckle contrast  
2 imaging (LSCI) measurements. Traditionally, ICT is regarded as a metric  
3 of blood flow, such as speed or perfusion. However, we highlight that ICT  
4 not only contains important information about blood flow, but also reflects  
5 the underlying structure of the vascular network. In the past, ICT has been  
6 found to be correlated with vessel diameter. Here, we further report that ICT  
7 exhibits a different sensitivity to blood flow depending on vessel orientation.  
8 Specifically, ICT is more sensitive to blood flow speed changes in vessels de-  
9 scending from or arising to the tissue surface, compared with those laying  
10 parallel to the surface. Those findings shift our understanding of ICT from  
11 purely blood flow to a combination of blood flow and vascular network struc-  
12 ture. We also develop theories to facilitate the study of vascular network's  
13 impact on ICT.

*Keywords:* dynamic light scattering, laser speckle contrast imaging, inverse  
correlation time, blood flow, vascular network

*PACS:* 0000, 1111

*2000 MSC:* 0000, 1111

---

## 14 1. Introduction

15 Laser speckle contrast imaging (LSCI) has gained attention in recent years  
16 for the quantification of blood flow in biomedical imaging applications<sup>1-3</sup>. It

17 is non-invasive, non-ionizing and label free. In general, the higher the blood  
18 flow speed, the more rapidly the speckle patterns will vary in time, leading to  
19 a lower speckle contrast when integrated over the camera exposure time<sup>4,5</sup>.  
20 Valuable information about blood flow perfusion in regions of interest can be  
21 extracted in real time from the continuous and wide-field 2-dimensional (2D)  
22 monitoring of speckle contrast<sup>6,7</sup>. Nevertheless, the speckle contrast only  
23 provides qualitative measurements of the underlying blood flow<sup>8</sup>. Numerous  
24 efforts have been put into advancing LSCI from qualitative to a quantitative  
25 imaging modality<sup>9-15</sup>.

26 One promising path is to relate speckle contrast to the autocorrelation  
27 function of detected electric field,  $g_1(\tau)$  and extract the inverse correlation  
28 time (ICT) as the index of blood flow. Within a limited set of conditions, ICT  
29 is proportional to the typical speed of blood flow within a certain range<sup>16,17</sup>,  
30 and it has demonstrated great potential in quantifying cerebral blood flow  
31 and facilitating intraoperative flow monitoring<sup>18-21</sup>.

32 In view of the promise of ICT in transforming LSCI to a quantitative  
33 imaging modality, the strategy to extract ICT from measured speckle dy-  
34 namics is gaining the significant attention. Initially this was done with  
35 single-exposure LSCI<sup>16,17</sup>, and more recently, multi-exposure speckle imaging  
36 (MESI) was developed to extract ICT more accurately from the confounding  
37 effects of static scattering, instrumentation noise and loss of correlation due  
38 to speckle averaging<sup>22-24</sup>. Recently, dynamic light scattering imaging (DLSI)  
39 was proposed to reduce the ICT estimating error owing to an inaccurate  
40 model of electric field autocorrelation function<sup>25</sup>.

41 Though ICT has been mainly interpreted as a metric of blood flow, such  
42 as speed, or perfusion, there is increasing evidence that ICT is subject to the  
43 structure of the vascular network. Kazmi et al.'s experimental results showed  
44 that ICT might be quantifying neither volumetric flux nor flow speed but the  
45 product of the flow speed and vessel diameter<sup>26</sup>. Fredriksson et al. reported  
46 the vessel packaging effect in which the confinement of blood to vessels with  
47 an average diameter of  $40\ \mu\text{m}$  could lead to a 50% reduction in perfusion  
48 estimation by LSCI compared with homogeneous blood distribution inside  
49 the tissue<sup>27</sup>. Jafari et al. found that ICT could be shifted over 10 times  
50 under the homogeneous assumption compared with using the actual vascular  
51 geometry, highlighting the significant impact of vascular geometry on ICT<sup>28</sup>.

52 The impact of vessel orientation on ICT has not been fully investigated  
53 yet. In this work, we conducted Monte Carlo simulations and found that ICT  
54 of vessels perpendicular to the tissue surface, i.e. descending from/arising to

55 the surface, exhibits a higher sensitivity to blood flow changes than that  
56 of vessels laying on the surface. Such finding is confirmed by experimental  
57 validation *in vivo* combining MESI and 2-Photon (2P) imaging. Those results  
58 suggest that the structure of the underlying vascular network deserves more  
59 attention than it currently receives in the interpretation of ICT. We also  
60 develop a generalized theory to facilitate the study on the impact of vascular  
61 network structure. It is compatible with all extant  $g_1(\tau)$  models and free of  
62 assumptions about groundtruth blood flow speeds.

## 63 2. Theory and Methods

### 64 2.1. A unified theoretical framework for ICT interpretation

65 According to the traditional dynamic light scattering (DLS) and diffusing  
66 wave spectroscopy (DWS) theories, in different scattering regimes (single vs.  
67 multiple) and flow conditions (ordered vs. unordered), different assumptions  
68 should be made about the form of the electric field autocorrelation function  
69  $g_1(\tau)$  [29–33], as shown in **Fig. 1A** [25].  $\tau_c$  is the correlation time and ICT  
70 is defined as  $1/\tau_c$ . The modulation number  $n$  is the main differentiating factor  
71 among those models.

72 In this paper, we first introduce a unified theoretical framework that is  
73 compatible with all extant  $g_1(\tau)$  models. After Monte Carlo simulation of  
74 photon migration inside the tissue, the electric field auto-correlation function  
75  $g_1(\tau)$  can be calculated according to Eq. 1 (ref. [34])

$$|g_1(\tau)| = \left| \int_{-\infty}^{\infty} P(Y) e^{jY\tau} dY \right| \quad (1)$$

76 where  $Y = \sum_{i=1}^N \vec{q}_i \cdot \vec{v}_i$  and  $\vec{q} = \vec{k}_o - \vec{k}_i$ .  $N$  is the number of dynamic scattering  
77 events experienced by a single photon.  $N$  can be larger than 1 hence Eq. 1  
78 accommodates both single and multiple scatter regimes.  $\vec{q}$  is the momentum  
79 transfer vector defined as the difference between the scattering wave vector  
80  $\vec{k}_o$  and the incident wave vector  $\vec{k}_i$  [35]. The direction of  $\vec{k}_o$  and  $\vec{k}_i$  is the  
81 propagating direction of the scattered light and incident light, respectively.  
82 The amplitudes are both equal to  $k_0$ , the wavenumber. Finally,  $\vec{v}_i$  is velocity  
83 of the scattering particle in the  $i$ -th dynamic scattering event experienced  
84 by the photon. For clarity sake, speed refers to scalars while velocity corre-  
85 sponds to vectors in this paper. Note that since the instantaneous velocity  
86 of Brownian particles is physically measurable<sup>36</sup>, we expand the definition of

87  $\vec{v}_i$  from the velocity of ordered motion as defined in ref. [34] to include both  
 88 ordered and diffusive motions.  $P(Y)$  is the probability density function of  $Y$ .  
 89 When some photons generate the same  $Y$  value, their weights will be added  
 90 together to give rise to  $P(Y)$ .  $Y$  can be interpreted as the accumulation of  
 91 frequency shifts induced by dynamic scattering (see Supplemental Material  
 92 section 1 for a more concise proof than ref. [37]).

$$g_1(\tau) = \int_{-\infty}^{\infty} \Omega(\omega) e^{j\omega\tau} d\omega \quad (2)$$

93 With  $g_1(\tau)$  rewritten in terms of  $Y$ , we notice that  $g_1(\tau)$  is the Fourier  
 94 transform of  $P(Y)$ . Considering the Wiener-Khintchine theorem, if  $\Omega(\omega)$   
 95 is the normalized power spectral density of the detected electric field, then  
 96  $g_1(\tau)$  would be the Fourier transform of  $\Omega(\omega)$  (Eq. 2) (ref. [38]). Therefore,  
 97 we arrive at Eq. 3 that  $P(Y)$  is a shifted version of  $\Omega(\omega)$

$$\Omega(\bar{\omega}) = P(Y) \quad (3)$$

98 where  $\bar{\omega} = Y + \omega_0$  and  $\omega_0$  is the center frequency of the electric field.

99 Substituting  $P(Y)$  for  $\Omega(\omega)$  is advantageous in that  $P(Y)$  reveals the  
 100 mechanism of spectrum broadening in LSCI since  $Y$  is the accumulation of  
 101 frequency shifts induced by dynamic scattering.  $P(Y)$  and specific forms of  
 102  $g_1(\tau)$  can be bridged by Eq. 4 and 5. For  $g_1(\tau) = e^{-|\tau|/\tau_c}$ ,

$$\frac{1}{\tau_c} = \Gamma \quad (4)$$

103 where  $\Gamma$  is the half width at half maximum of the Lorentzian  $P(Y) =$   
 104  $\frac{1}{\pi\Gamma} \left( \frac{1}{1 + \frac{Y^2}{\Gamma^2}} \right)$ . For  $g_1(\tau) = e^{-(\tau/\tau_c)^2}$ ,

$$\frac{1}{\tau_c} = \frac{1}{\sqrt{2}}\sigma \quad (5)$$

105 where  $\sigma$  is the standard deviation of the Gaussian  $P(Y) = \frac{1}{\sqrt{2\pi}\sigma} e^{-\frac{Y^2}{2\sigma^2}}$ . See  
 106 proof in Supplemental Material section 2.

107 These two equations (Eq. 4 and 5) provide new interpretations of ICT  
 108 (i.e.,  $\frac{1}{\tau_c}$ ) from the point of view of  $P(Y)$ . For Lorentzian  $P(Y)$ , ICT deter-  
 109 mines the half width at half maximum while in Gaussian  $P(Y)$ , ICT is a  
 110 scaled version of the standard deviation. Note that in both cases, ICT serves  
 111 as a kind of measure of the broadening of the spectrum of  $Y$ . In fact, as long

112 as the spectrum of detected light is both bandwidth- and amplitude-limited,  
113 a more general linear relationship

$$114 \quad \left(\frac{1}{\tau_c}\right)^2 \propto \text{Var}(Y)$$

115 can be shown to hold for any electric field auto-correlation functions taking  
116 the form of  $g_1(\tau) = e^{-(|\tau|/\tau_c)^n}$  (see Supplemental Material section 3 for proof).  
117 This suggests that ICT in the various  $g_1(\tau)$  models shown in Fig. 1a can be  
118 unified as the reduced case of the standard deviation of  $Y$ . Since  $P(Y)$   
119 is essentially the same as the power spectral density of the electric field of  
120 detected light (Eq. 3), ICT can be interpreted as the scaling factor of the  
121 variance of the detected optical spectrum as well. Since  $\text{Var}(Y)$  measures  
122 the variance of frequency shifts in the dynamics scattering process, we call it  
123 the variance of dynamic scattering.

## 124 2.2. Characterizing the inherent properties of vascular network to produce 125 ICT

126 In this section, we aim to decouple the effects of blood flow speeds and  
127 vascular structure on ICT and develop tools to study the vascular network  
128 individually. Further analyzing the structure of  $Y$  and separate the contri-  
129 butions to  $Y$  by the blood flow and others, we arrive at Eq. 6

$$Y = Y_s + Y_f = Y_s + k\tilde{v} \quad (6)$$

130 where  $Y_f$  represents the contributions to  $Y$  by motions induced by blood flow  
131 while  $Y_s$  denotes the component in  $Y$  that is independent of the blood flow.  
132  $Y_f$  can be expressed as the product of  $k$  and  $\tilde{v}$  where  $k = \sum_{i=1}^N |\vec{q}_i| \cos \alpha_i$ ,  
133  $\tilde{v} = \frac{\sum_{i=1}^N |\vec{q}_i| \cos \alpha_i \cdot |\vec{v}_i|}{\sum_{i=1}^N |\vec{q}_i| \cos \alpha_i}$  and  $\alpha_i$  is the angle between  $\vec{q}_i$  and  $\vec{v}_i$ . The  $\vec{q}_i$ ,  $\vec{v}_i$  and  $N$   
134 follow same definition as in Eq. 1.

135 Note that  $\tilde{v}$  represents the weighted average of absolute blood flow speeds  
136 and the weighting is determined by the photon's scattering geometry, i.e., the  
137 scattering angle and the angle between the momentum transfer vector  $\vec{q}_i$  and  
138 velocity vector  $\vec{v}_i$ .  $k$  is the sum of weights and equal to  $Y_f$  when blood flow  
139 speeds are all unit speeds.

140 Also notice that  $k$  and  $\tilde{v}$  are well de-correlated from each other. To under-  
141 stand this, it is helpful to view  $k$  as the sum of weights and  $\tilde{v}$  as the weighted  
142 average of blood flow speeds. When the sum of weights changes, we would  
143 not be able to predict how the weighted average will change if little is known  
144 about how the individual weight changes. The weighted average can increase

145 or decrease. It can also remain invariant if the weights increase/decrease by  
146 the same ratio.

147 Furthermore, if we assume that blood flow speeds are uncorrelated with  
148 the photon's scattering geometry (i.e., the scattering angle and the angle  
149 between  $\vec{q}_i$  and  $\vec{v}_i$  are uncorrelated with the magnitude of the flow vector),  $\tilde{v}$   
150 and  $k$  would be uncorrelated (see proof in Supplemental Material section 4).  
151 With this uncorrelated relationship, we arrive at Eq. 7 and 8

$$E(Y) = E(Y_s) + E(k) E(\tilde{v}) \quad (7)$$

152

$$\text{Var}(Y) = \text{Var}(Y_s) + \text{Var}(k) E(\tilde{v}^2) + E^2(k) \text{Var}(\tilde{v}) \quad (8)$$

153 where  $E(X)$  and  $\text{Var}(X)$  give the expectation and variance of the random  
154 variable  $X$ , respectively.

155 Eq. 7 and 8 points out the relationship between statistical properties of  
156  $Y$  and those of  $k$  and  $\tilde{v}$ . Further approximations to Eq. 8 can be made to ac-  
157 commodate blood flow quantification. Either of the following two conditions  
158 is sufficient for Eq. 9 to be applied with good accuracy. First, the vascular  
159 structure sampled by detected photons is dominated by a single vessel, i.e.,  
160  $\text{Var}(\tilde{v})$  is approximately 0. This is true for major surface vessels where dy-  
161 namic scattering events of detected photons are strongly localized within that  
162 vessel<sup>8,21,33</sup>. Second, the scattering of collected photons is fully randomized,  
163 i.e.,  $E(k)$  is 0. This is true for parenchyma regions where dynamic scattering  
164 is dominated by micro-vessels whose orientation is randomized. Our simula-  
165 tion results of  $E(k)$  on parenchyma regions also support that as section 3.1  
166 will show.

$$\text{Var}(Y) = \text{Var}(Y_s) + \text{Var}(k) E(\tilde{v}^2) \quad (9)$$

167 With Eq. 9, we define the characteristic variance of dynamic scattering  
168 as  $\text{Var}(k)$ . If we plot Eq. 9 (Fig. 2), the physical implications of  $\text{Var}(k)$  are  
169 evident as the slope.  $\text{Var}(k)$  can be defined for each detection point (i.e.,  
170 a pixel on the camera) in LSCI and it characterizes the ability of the sam-  
171 pled vascular network to decrease speckle contrast or increase ICT under the  
172 specified illumination/detection setup at the detection point. The larger the  
173  $\text{Var}(k)$ , the stronger the ability of the vascular network to decrease speckle  
174 contrast or increase ICT under the same blood flow speed, at the detection  
175 point. In addition,  $\text{Var}(k)$  is independent of the blood flow speed since it

176 is defined with unit speeds. Hence, it reveals the inherent properties of the  
 177 vascular network under the specified illumination/detection setup.

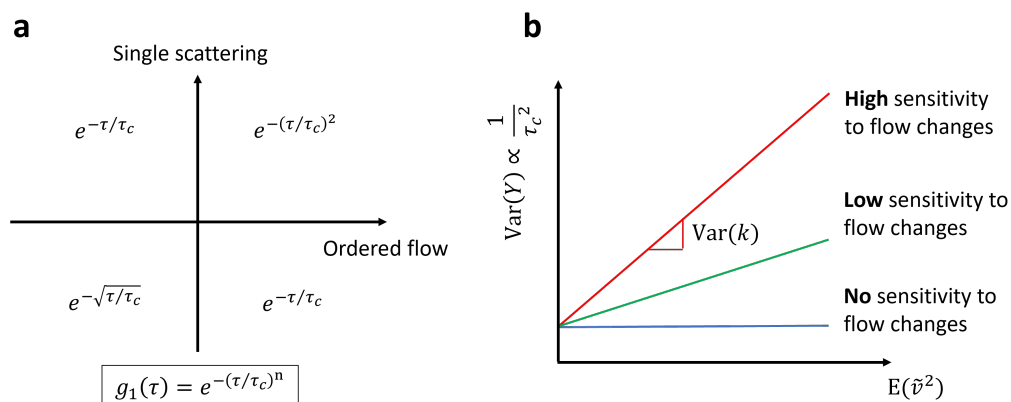

Figure 1: **A unified theoretical framework for ICT interpretation.** **a** The various  $g_1(\tau)$  models proposed in treatment of the complex vascular network in LSCI. Extant models of the electric field auto-correlation function in various cases of scattering regimes and flow conditions.  $\tau_c$  is the correlation time and ICT is defined as  $1/\tau_c$ . On the quadrant plot, the opposite of the order motion is unordered motion (also known as diffusive motion) and that of single scattering is multiple scattering. **b** Physical meaning of the characteristic variance of dynamic scattering. The vertical axis depicts the variance of dynamic scattering  $\text{Var}(Y)$  which is proportional to the square of ICT. The horizontal axis is the weighted average of blood flow speeds sampled by the photon scattering process. The slope of the plot is  $\text{Var}(k)$ . A steeper slope indicates a vascular network of higher sensitivity to flow changes.

### 178 2.3. Monte Carlo simulation

179 The simulation algorithm is based on ref. [28]. The uniform flat beam  
 180 profile is used for simulation. The effects of ordered motion of the RBCs  
 181 along the direction of vessels are investigated in this study. Though the  
 182 diffusive motion of RBCs has been recently suggested as dominating the  
 183 correlation decay in diffuse correlation spectroscopy (DCS) measurements<sup>39</sup>,  
 184 it is unclear whether the effects are due to the radially diffusive motion of  
 185 RBCs within vessels or axially ordered motion of RBCs along the vessel but  
 186 within a diffusive vascular network where vessels are curved and direction-  
 187 randomized. Nor it is clear whether the observation holds in LSCI. Jafari et  
 188 al. found that the axially ordered motion of RBCs along the vessel adequately  
 189 describes the particle dynamics in LSCI given the strong agreement between



190 experimental and simulated speckle contrast values<sup>28</sup>. Hence, the effects of  
191 radially diffusive motion of RBCs within vessels might be negligible in LSCI.  
192 The potential impact of radially diffusive motion of RBCs within vessels to  
193 findings of this study is also discussed in section 4.1.

194 The simple vascular geometry for simulation is made of parallel and  
195 equally spaced vessels (similar to ref. [39]). Vessels in the first geometry  
196 are parallel to  $y$  axis, and parallel to  $z$ -axis in the second geometry (Fig. 2a).  
197 Some of the major settings are as follows: geometry size:  $1 \times 1 \times 1 \text{ mm}^3$ ,  
198 the radius of vessels: 0.01 mm, space between vessels: 0.1 mm, radius of  
199 the incident beam: 0.25 mm, radius of the detector: 0.01 mm, NA of the  
200 detector: 0.2. The detector is placed in the center of the field of view and  
201 right above the vessels. The optical properties of vessels and tissue are the  
202 same as in ref. [39].

203 For the realistic vascular geometry (shown in Fig. 2b), the simulation flow  
204 for generating the photon trajectories through the 3D geometry is detailed by  
205 Jafari et al.<sup>28</sup>. Briefly, parallelized Dynamic Light Scattering Monte Carlo  
206 (DLS-MC) simulations were launched on the Stampede2 Skylake compute  
207 nodes on Texas Advanced Computing Center (TACC) using the Message  
208 Passing Interface (MPI) protocol to simulate  $80 \times 10^9$  photon trajectories  
209 through the geometry.

210 The realistic vascular geometry was obtained through 2P imaging, fol-  
211 lowed by vectorization of the vascular structure<sup>40</sup>. The vectorized geometry  
212 was voxelized into a three-dimensional matrix of the size  $277 \times 277 \times 303$   
213 voxels in the X, Y, and Z directions, respectively. The voxel size was a cubic  
214  $2 \times 2 \times 2 \mu\text{m}^3$ , yielding a total geometry size of  $554 \times 554 \times 606 \mu\text{m}^3$ . A  
215 circular collimated wide-field beam with a flat profile was set to illuminate  
216 95% of the top surface of the geometry. A NA of 0.25 and detector size of  
217  $9.8 \times 9.8 \mu\text{m}^2$  were used in the simulation settings to reflect the typical con-  
218 figuration of LSCI experimental setup. For detected photons, both entry and  
219 exit locations as well as the photon trajectories through the volume and pho-  
220 ton weights were recorded. The optical properties of capillaries, non-capillary  
221 vessels and extra-vascular tissue as used in ref. [28] are adopted.

#### 222 2.4. *In vivo* experimental validation

223 The MESI imaging system detailed in ref. [21, 22] is used for microfluidics  
224 and *in vivo* speckle imaging experiments. The laser wavelength is 785 nm and  
225 the magnification of the system is 2x. 56 MESI sequences with each sequence  
226 containing 15 speckle contrast images corresponding to 15 exposure times are



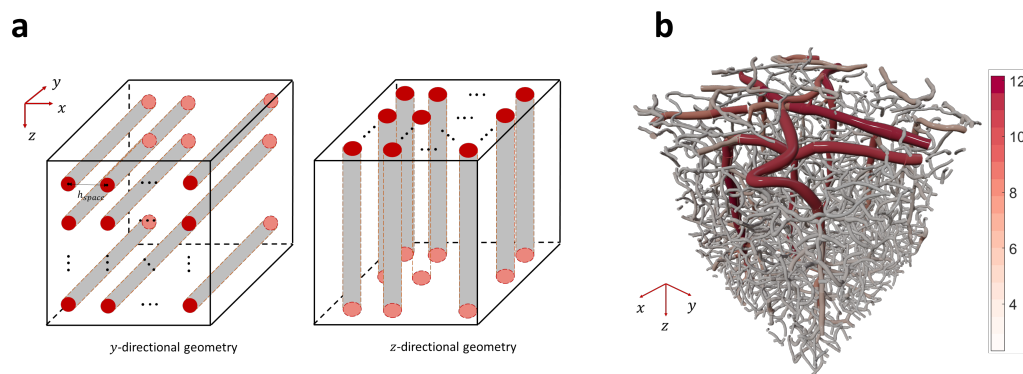

Figure 2: **Vascular geometry in Monte Carlo simulation.** **a** The diagram of simple  $y$ - and  $z$ -directional vascular geometry. **b** The realistic vascular geometry scanned from a mouse's cerebral cortex. The geometry size is  $554 \times 554 \times 606 \mu\text{m}^3$ . 3D rendering by Blender 2.81 (ref. [41]). Color coded by vessel radius (unit:  $\mu\text{m}$ ).

227 acquired. The  $K^2$  curves are calculated by averaging speckle contrast values  
228 over multiple MESI sequences and then squaring it. ICT values are then  
229 extracted by fitting the  $K^2$  curves based on the MESI model<sup>22</sup>.

230 The mouse cranial window preparation procedures were detailed by Kazmi  
231 et al.<sup>26</sup>. During imaging sessions, the mouse (C57BL/6, Charles River Lab-  
232 oratories Inc.) was anesthetized with medical grade  $\text{O}_2$  vaporized isoflurane  
233 (3% induction, 1.5% maintenance).

234 For 2P imaging, images were acquired with a custom microscope and  
235 laser system<sup>42,43</sup>. The same anesthesia procedure as above-mentioned was  
236 used. In addition, 100  $\mu\text{L}$  of 70 kDa dextran-conjugated Texas Red diluted  
237 in saline at a 5% w/v ratio was added to the blood plasma through retro-  
238 orbital injection prior to imaging. The dye was then excited by an Yb fiber  
239 amplifier ( $\lambda = 1060 \text{ nm}$ ). 30 frames acquired with a resonant scanner were  
240 averaged at each depth to produce images.

241 All animal procedures in this study were approved by The University of  
242 Texas at Austin Institutional Animal Care and Use Committee (IACUC).

### 243 3. Results

#### 244 3.1. Monte Carlo Simulation

245 The simulation results on the realistic vascular network under normal il-  
246 lumination are shown in Fig. 3. Figure 3a-e shows the map of the number of

247 detected dynamic photons (i.e., photons experiencing dynamic scattering at  
 248 least once),  $\text{Var}(k)$ ,  $E(k)$ , and  $\text{Var}(Y)$ , respectively. To counter the effects of  
 249 wavelength, the  $\text{Var}(Y)$ ,  $\text{Var}(k)$  and  $E(k)$  are normalized by the wavenum-  
 250 ber, i.e.  $\text{Var}(Y/k_0)$ ,  $\text{Var}(k/k_0)$  and  $E(k/k_0)$ , unless specified otherwise.

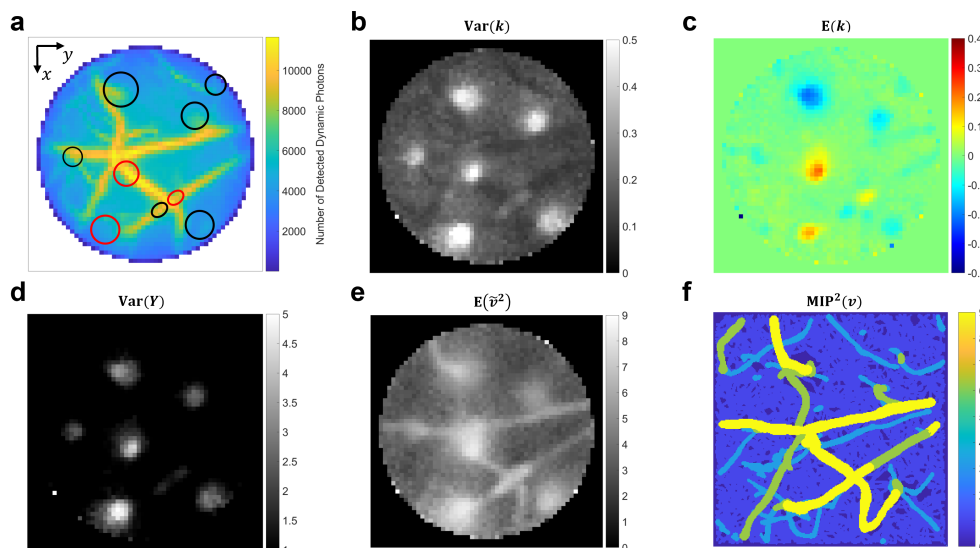

Figure 3: **Simulation results on the realistic vascular network under normal illumination.** **a** The map of the number of detected dynamic photons at each camera pixel. The dynamic photons refer to photons which experience at least one dynamic scattering event before exiting and being detected. **b-f** The map of  $\text{Var}(k)$ ,  $\text{Mean}(k)$ ,  $\text{Var}(Y)$ ,  $E(\tilde{v}^2)$ , and  $\text{MIP}^2(v)$ , respectively.  $\text{MIP}^2(v)$  represents the square of maximum intensity projection of flow speeds assigned in simulation. The position of bright spots in (b), (c) and (d) is circled out correspondingly in (a).

251 There are several interesting observations. First, note the bright blobs in  
 252 Fig. 3b, d and blue/orange blobs in Fig. 3c whose positions are circled in Fig.  
 253 3a. The reason that those blobs appear in those places instead of elsewhere  
 254 is suspected to be correlated with the underlying vascular structure and we  
 255 find that there is always a major descending/ascending vessel in those spots  
 256 (Fig. 2b and Supplemental Material section 5).

257 Second, the major surface vessels extending in the  $x$ - $y$  plane shown in Fig.  
 258 3a appear even darker than surrounding parenchyma regions in the  $\text{Var}(k)$   
 259 map (Fig. 3b). This suggests that  $\text{Var}(k)$  might be sensitive to the orien-  
 260 tation of vessels, namely, small for  $x$ - $y$  plane surface vessels while large for

261  $z$ -directional descending vessels under normal illumination. This hypothesis  
262 is verified by simulation results on the simple vascular geometries consist-  
263 ing of parallel and equally-spaced vessels.  $\text{Var}(k)$  of  $z$ -directional vessels is  
264 observed to increase by 7 times compared with that of  $y$ -directional vessels  
265 under normal illumination (Supplemental Material section 6).

266 Third, among those blobs, some are blue while others appear orange in  
267 Fig. 3c. Further analysis on the flow vector assignment in simulation reveals  
268 that this is dependent on whether the flow vector is  $z$ -positive or  $z$ -negative  
269 (Supplemental Material section 7).

270 Finally,  $E(k)$  of parenchyma regions is 0 (Fig. 3c). Hence, Eq. 9 can be  
271 applied with good accuracy. With  $\text{Var}(Y_s)$  being 0 in simulation, we could  
272 calculate  $E(\tilde{v}^2)$  by dividing  $\text{Var}(Y)$  with  $\text{Var}(k)$ . As Fig. 3e shows, the  $E(\tilde{v}^2)$   
273 map reveals a clearer structure of surface vessels than  $\text{Var}(Y)$  (Fig. 3d). To  
274 evaluate accuracy of the absolute blood flow speed estimation given in Fig.  
275 3e, the square of the maximum intensity projection (MIP) of blood flow  
276 speeds assigned in simulation is mapped in Fig. 3f. In terms of the resolved  
277 vessels, the shape of  $x$ - $y$  plane surface vessels is well preserved in Fig. 3e and  
278 the intensity value also shows a good match with that in Fig. 3f. However,  
279 for  $z$ -directional descending vessels, the vessel boundary is expanded and  
280 there is no clear border, which highlights their distinct properties in LSCI  
281 from  $x$ - $y$  plane surface vessels.

### 282 3.2. Experimental validation

283 The enhanced sensitivity of speckle contrast to blood flow speed in  $z$ -  
284 directional vessels compared with  $x$ - $y$  plane vessels is also observed *in vivo*.  
285 As highlighted by white arrows in Fig. 4a and b, the orthogonal X-Y and  
286 X-Z cross-sections of 2P imaging data clearly reveal an inverted “L” shaped  
287 vessel. At the end of its surface strand, it develops into a descending strand  
288 into the tissue. ROI of the two strands is shown by the white boxes in Fig.  
289 4d. Notice that there is no other major vessel branch on this “L” shape  
290 and vessel diameters of the two strands are approximately the same. Thus,  
291 based on blood flow conservation<sup>26</sup>, the flow speed should be approximately  
292 the same in these two strands. Nevertheless, we see a lower speckle contrast  
293 in areas corresponding to the descending strand as pointed out by the white  
294 arrow in Fig. 4c. It indicates an enhancement of the sensitivity of speckle  
295 contrast to blood flow speed in the descending strand compared with surface  
296 strand. More specifically, the average ICT squared of the descending strand  
297 is  $\sim 78\%$  larger than that of its surface counterpart, as highlighted by white

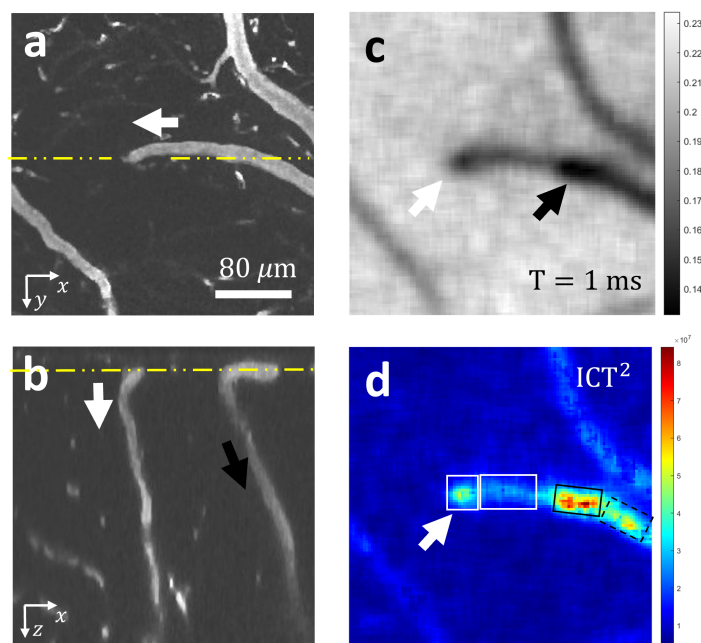

Figure 4: **One example of the  $z$ -directional descending vessel inducing a more significant decrease of speckle contrast and increase of ICT than its upstream  $x$ - $y$  plane surface strand *in vivo*.** **a, b** Orthogonal cross-sections of the vascular structure acquired from 2P imaging. **(a)** X-Y cross-section (depth:  $27\ \mu\text{m}$ ); **(b)** X-Z cross-section along the yellow dashed line in **(a)**. The yellow line in **(b)** indicates the  $z$  position of **(a)**. White arrows in **(a)** and **(b)** indicate the direction of an upside-down “L” shaped vessel which has a surface strand extending horizontally on the surface followed by a descending strand deep into the tissue. scale bar:  $80\ \mu\text{m}$ . The spatial scale along the  $x$ - and  $z$ -axis is the same in **(b)**. **c** Single-exposure speckle contrast image of the vascular network. Camera exposure time  $T=1\ \text{ms}$ . The white arrow indicates position of the descending vessel strand which shows a stronger decrease of speckle contrast than its connected  $x$ - $y$  plane surface strand. **d** The map of ICT square. The two white boxes highlight the descending strand and surface strand, respectively. The white arrow indicates the position of the descending strand exhibiting a larger ICT value than its connected  $x$ - $y$  plane counterpart. The black arrow in **b** highlights another descending vessel branch from the main vessel. The black arrow in **c** and black boxes in **d** indicate the compound effects of vascular structure and blood flow in modulating speckle contrast and ICT values.

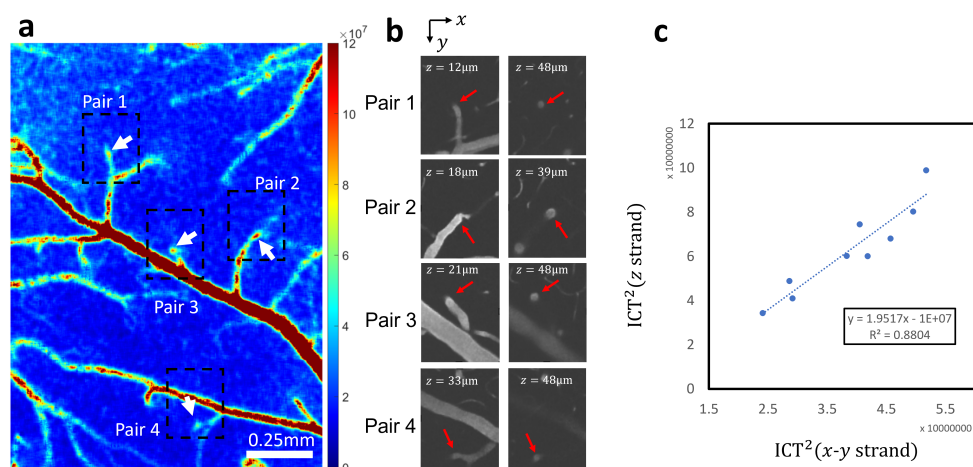

Figure 5: **Statistical comparison of ICTs between the  $z$ -directional descending vessel strand and its upstream  $x$ - $y$  plane surface strand *in vivo*.** **a** Pairs of  $z$  strand and  $x$ - $y$  strand in a typical mouse cerebral window whose position is highlighted by the dashed rectangle on the ICT squared image. The arrows point to the descending vessel in each pair. Scale bar: 0.25mm. **b** The corresponding 2P images showing the vascular structure of the four pairs of  $z$  strands and  $x$ - $y$  strands. The first column shows the X-Y cross-section of the vascular structure near the surface while the second column shows the cross-section at the same location but in a deeper tissue. The red arrows point to the  $z$  strands in the pair. **c** The juxtaposing of ICT squared of the  $z$  strand and that of the contiguous  $x$ - $y$  strand. The scatter plot shows the data of nine  $z$  and  $x$ - $y$  strand pairs from three mice. The linear fitting is performed and the slope is around 2, larger than 1, which indicates that the ICT of  $z$ -directional vessels could be larger than that of  $x$ - $y$  plane vessels even though they assume the same blood flow speed. The difference between ICT squared of the  $z$  strand and that of the paired  $x$ - $y$  strand is statistically significant (paired t-test,  $n=9$ ,  $p < 0.001$ ).

298 boxes in Fig. 4d). If the impact of  $\text{Var}(Y_s)$  is negligible, it implies that  
299  $\text{Var}(k)$  of the descending strand would be more than 75% larger than that  
300 of surface strand. Notably, similar border expansion is also observed here in  
301 the position of the descending strand as in simulation (Fig. 3e).

302 To further evaluate the statistical significance of the enhanced sensitivity,  
303 9 pairs of  $z$ -directional vessels and  $x$ - $y$  plane vessels from 3 mice are analyzed.  
304 Those vessel pairs are selected for analysis because their vascular structure  
305 has the same properties as in the example mentioned above, i.e., the upside-  
306 down L vessel shape and the approximately same diameter of the two strands.  
307 The location of four  $z$  and  $x$ - $y$  strand pairs in a typical mouse cerebral window  
308 is shown in Fig. 5a and their vascular structure is acquired by 2P imaging  
309 (Fig. 5b). ROI of the  $z$  and  $x$ - $y$  strands in each pair is selected in the  
310 similar way as shown by white boxes in Fig. 4d. The ICT squared of the  $z$   
311 strand in each pair is plotted against that of the  $x$ - $y$  strand (Fig. 5c). The  
312 linear fitting results in a slope of approximately 2. In addition, the difference  
313 between ICT squared of  $z$  strand and that of its contiguous  $x$ - $y$  strand is  
314 statistically significant (paired t-test,  $n=9$ ,  $p < 0.001$ ). Those results provide  
315 direct experimental evidence for the enhanced sensitivity of ICT to blood  
316 flow changes in  $z$ -directional vessels compared with vessels extending in the  
317  $x$ - $y$  plane.

318 Finally, the compound effects of vascular structure and blood flow should  
319 be noticed. As highlighted by the black arrow in Fig. 4b, there is another  
320 descending vessel branch from the main vessel. The blood flow in the main  
321 vessel splits into two portions: one goes into the above-mentioned inverted  
322 “L” shaped vessel and the other goes into this second descending vessel.  
323 Therefore, the speckle contrast and ICT in the solid black rectangle in Fig.  
324 4d result from not only an underlying descending vessel but also the larger  
325 blood flow in the main vessel. That is why they are not directly comparable  
326 with those of the descending strand in the white square in Fig. 4d. Interest-  
327 ingly, the enhanced sensitivity can be roughly examined if we compare the  
328 ICT squared in the solid-line black rectangle with that in the dashed black  
329 rectangle in Fig. 4d. Both areas cover the main vessel of the largest blood  
330 flow but the solid rectangle assumes larger ICT squared, which indicates the  
331 additional impact of the descending vessel in the solid square. Similarly, the  
332 joint effects of vascular structure and blood flow are observed in the region  
333 of vessel pair 2 in Fig. 5a where a second descending vessel is also present  
334 (Fig. 5b).



## 335 4. Discussion

### 336 4.1. Bridging ICT to physiologically meaningful blood flow variables

337 Given the volume integrated nature of LSCI and the complexity of the  
338 vascular network, it has been long hypothesized that if LSCI is measuring  
339 some physiologically meaningful blood flow variable, it measures the weighted  
340 average of that variable within the probed volume [22, 39]. However, it is  
341 unclear how the weighting is determined. Our derivation in section 3.1 and  
342 3.2 reveals that the weighting is determined by photons' dynamic scattering  
343 process, according to the definition of  $\tilde{v}$  (Eq. 6). Note that  $\tilde{v}$  is physiologically  
344 meaningful and represents the weighted average of blood flow speeds probed  
345 by detected photons. In the case that all dynamic scattering events sample  
346 the same blood flow speed  $v$ ,  $\tilde{v}$  would be equal to  $v$  regardless the weighting.

347 Combining the results in section 2.1 and 2.2, a general relationship be-  
348 tween ICT and physiologically meaningful blood flow variables, i.e.  $\tilde{v}$ , can  
349 be established. In section 2.1, it has been shown that ICT squared is pro-  
350 portional to the variance of  $Y$ , which accommodates all current  $g_1(\tau)$  models  
351 in LSCI. In section 2.2, Eq. 9 further points out that the variance of  $Y$   
352 assumes a linear relationship with the expectation of  $\tilde{v}$  squared. Hence, the  
353 linear relationship between ICT squared and the expectation of  $\tilde{v}$  squared is  
354 reached by our theoretical derivation.

355 Contrary to the frequently adopted notion that ICT is proportional to  
356 blood flow speed, our theory concludes that the squares of the two that are  
357 linear to each other. The difference between the two notions is centered on  
358 whether  $\text{Var}(Y_s)$  is zero or not. Pragmatically, the existence of  $\text{Var}(Y_s)$  is  
359 indispensable to tackling the "biological zero" problem which refers to the  
360 non-zero residual signal even when no blood flow is present<sup>37,44</sup>. A non-  
361 zero  $\text{Var}(Y_s)$  might reduce the difference of ICT values between descend-  
362 ing/ascending vessels and surface vessels. As observed in simulation, the  
363  $\text{Var}(k)$  of  $z$ -directional vessels is 7 times larger than that of  $y$ -directional  
364 vessels in the simple vascular geometry, which is expected to generate a ICT  
365 squared difference of 7 times according to Eq. 9 if  $\text{Var}(Y_s)$  is zero. However,  
366 ICT squared *in vivo* is only 60% larger on average in descending/ascending  
367 vessels than vessels laying on the surface. A non-zero  $\text{Var}(Y_s)$  *in vivo* could  
368 play a significant role in accounting for such discrepancy. In addition, the  
369 scatters' movement could be more diverse *in vivo* compared with our settings  
370 in simulation. For example, the radially diffusive motion of RBCs in vessels  
371 is not present in our simulation.



372  $\text{Var}(k)$  plays a major role in bridging ICT and the physiologically mean-  
373 ingful blood flow variable,  $\tilde{v}$ , as Eq. 9 points out. It provides a theoretical  
374 basis for extracting the physiologically meaningful blood flow variable  $\tilde{v}$  from  
375 ICT. Given the  $\text{Var}(k)$  already known of the vascular network, the estima-  
376 tion of absolute statistical blood flow speeds could be made by dividing the  
377 measured  $\text{Var}(Y)$  by  $\text{Var}(k)$  (Fig. 3e). Note that  $\text{Var}(Y_s)$  is assumed 0 in  
378 simulation.

379 Finally, our findings showed partial support for Briers et al.’s method of  
380 converting measured ICT values to absolute blood flow speeds. Specifically,  
381 the conversion is performed by  $v_c = \lambda/(2\pi\tau_c)$  where  $v_c$  is named decorrelation  
382 velocity,  $\lambda$  is wavelength and  $\tau_c$  is correlation time<sup>16,17</sup>. Our theory shows  
383 that this is in fact acquired by assuming  $\text{Var}(Y_s) = 0$  and approximating  
384  $\text{Var}(k)$  with  $k_0^2$ , the square of wavenumber (Eq. 9).

#### 385 4.2. Interpretation and practical implications of $\text{Var}(k)$

386  $\text{Var}(k)$  can be interpreted at both the microscopic and macroscopic scales.  
387 Microscopically, by definition (Eq. 6 and 8), it provides an essential char-  
388 acterization for the variation of photons’ dynamic scattering process inside  
389 the probed medium in terms of the accumulated frequency shift. Macro-  
390 scopically, as revealed by Eq. 9, it reflects the ability of the probed vascular  
391 network to induce a decrease of speckle contrast or increase of ICT for a given  
392 illumination and detection setup. The micro and macro-scale interpretations  
393 are connected due to the fact that photons’ dynamic scattering is mainly  
394 constrained within the vascular network.

395  $\text{Var}(k)$  also illustrates that it is challenging, if not impossible, to do abso-  
396 lute blood flow speed measurements through a generalized calibration since  
397  $\text{Var}(k)$  is unique for a given vascular network. When the probed vasculature  
398 changes,  $\text{Var}(k)$  also changes.

#### 399 4.3. Physical mechanism and practical implications of the directionality sus- 400 ceptibility

401 The different sensitivity of ICT to the blood flow speed in  $x$ - $y$  plane vessels  
402 and  $z$ -directional descending/ascending vessels is likely due to the different  
403 flow direction in those vessels. One might argue that in descending/ascending  
404 vessels, the ratio of blood volume in the overall volume sampled by detected  
405 photons might be larger than that in the surface vessels. And it might be  
406 the larger blood volume ratio in descending/ascending vessels that is caus-  
407 ing the higher sensitivity of ICT to the blood flow. We exclude this theory

408 by manipulating the flow direction in simulation. If the blood volume ratio  
 409 theory is true, then  $\text{Var}(k)$  of  $z$ -directional vessels should remain larger than  
 410 that of  $x$ - $y$  plane vessels even if the direction of flow is changed since the  
 411 blood volume ratio is invariant. However, it is observed that  $\text{Var}(k)$  of the  
 412  $z$ -directional vascular geometry is smaller than that of  $y$ -direction vascular  
 413 geometry after switching the flow direction in  $z$ -directional vascular geome-  
 414 try to  $y$ -direction and that in  $y$ -directional vascular geometry to  $z$ -direction  
 415 (Table S2). Validation on the realistic vascular geometry shows consistent  
 416 results (Fig. 6). The bright blobs originally present in the  $\text{Var}(k)$  map  
 417 (Fig. 3b) are removed after the amplitudes of  $y$  and  $z$  component of the unit  
 418 velocity vector of blood flow are swapped (Fig. 6a). Instead, the position  
 419 of  $y$ -directional vessels is highlighted. However, such phenomena would not  
 420 appear if it is the amplitudes of  $x$  and  $y$  component that are swapped (Fig.  
 421 6b).

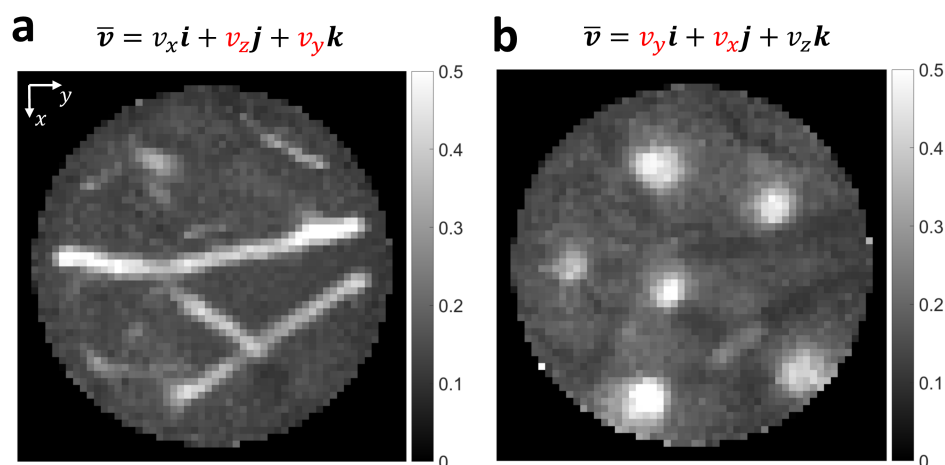

Figure 6: **Map of  $\text{Var}(k)$  with the blood flow direction switched in realistic vascular geometry.** **a** The amplitudes of  $y$  and  $z$  components of the unit velocity vector of blood flow are swapped in simulation. **b** The amplitudes of  $x$  and  $y$  components of the unit velocity vector of blood flow are swapped in simulation.

422  $\text{Var}(k)$  not only quantifies and reveals the directionality susceptibility of  
 423 LSCI to vessel orientation, but also helps explain such susceptibility. Since  
 424  $\text{Var}(k)$  measures the overall variance of  $k$  of detected photons, it is suscep-  
 425 tible to the range determined by the extreme values of  $k$ . Consider extreme  
 426 values of  $k$  of singly scattered photons first where  $k = |\vec{q}| \cos \alpha$ . Under normal

427 illumination,  $|\vec{q}| \approx 2k_0$  and  $\vec{q}$  is along the  $z$ -axis. Therefore,  $k$  would be max-  
428 imized when  $\cos \alpha$  is maximized. Since  $\alpha$  is the angle between velocity vector  
429  $\vec{v}$  and momentum transfer vector  $\vec{q}$  which is along the  $z$ -axis,  $\cos \alpha$  would be  
430 maximized when  $\vec{v}$  is also along the  $z$ -axis. That explains why  $z$ -directional  
431 vessels have larger  $\text{Var}(k)$  values than  $x$ - $y$  plane surface vessels. Finally, for  
432 photons that are scattered multiple times, the randomized directions of  $\vec{q}$  and  
433  $\vec{v}$  make it difficult to generate extreme  $k$  values since the effects of multiple  
434 scattering events can cancel out with each other. Hence, the directionality  
435 susceptibility mainly originates from the directionality susceptibility retained  
436 in single-scattering or few-scattering components of the detected light.

437 The directionality susceptibility of LSCI has several practical implica-  
438 tions. First, direct comparison of ICT values in  $x$ - $y$  plane vessels and in  
439 ascending/descending vessels should be avoided. If a descending/ascending  
440 vessel exhibits a larger ICT value, it does not necessarily imply a higher  
441 blood flow than its surface counterpart. Second, the special property of  $z$ -  
442 directional vessels, i.e., enhanced ability to induce the decrease of speckle  
443 contrast and increase of ICT under the same blood flow speed, might be use-  
444 ful in locating descending/ascending vessels. Note that those types of vessels  
445 are particularly prevalent in cerebral cortex and play an important role in  
446 the blood supply to deeper tissues.

## 447 5. Conclusion

448 The interpretation of ICT is a key topic in quantitative LSCI. Though  
449 it has been mainly considered as a metric of blood flow, there is increasing  
450 evidence that it is susceptible to the structure of vascular network. We build  
451 a theoretical framework to facilitate the modeling of the vascular network's  
452 impact on ICT and find that ICT is modulated by vessel orientation. In both  
453 simulation and *in vivo* experimental validation, ICT of descending/ascending  
454 vessels exhibits a higher sensitivity to blood flow changes than in surface-  
455 extending vessels. The different sensitivity is shown due to the flow direction  
456 instead of blood volume ratio by simulation. The single-scattering compo-  
457 nent of the detected light might play a major role in ICT's susceptibility to  
458 vessel orientation. Those results suggest that the impact of vascular network  
459 structure warrants more attention and investigation in the interpretation of  
460 ICT.

## 461 **Acknowledgements**

462 This work is supported by National Institutes of Health (NIH) (Grant  
463 NS108484, EB011556) and UT Austin Portugal Program. The authors ac-  
464 knowledge Texas Advanced Computing Center (TACC) at UT Austin for  
465 providing high-performance computing resources. The authors also would  
466 like to express thanks to Chenmu Zhang and Dr. Zhongcan Xiao for the  
467 inspiring discussion on Supplemental Material section 3; thanks to Dr. Colin  
468 Sullender for the advice on troubleshooting MESI system; and finally, thanks  
469 to Samuel A. Mihelic for the help with Blender rendering.

## 470 **Author Contributions**

471 Q.F. and A.K.D. developed the theory and designed the experiments;  
472 Q.F. and C.Z.J did the Monte Carlo simulation experiments; S.E. and A.T  
473 performed the *in vivo* mice imaging experiments; Q.F., C.Z.J, A.T., S.E. and  
474 A.K.D wrote the paper together.

## 475 **Conflicts of Interest**

476 The authors declared no conflicts of interest.

## 477 **References**

- 478 [1] AF Fercher and J David Briers. “Flow visualization by means of single-  
479 exposure speckle photography”. In: *Optics communications* 37.5 (1981),  
480 pp. 326–330.
- 481 [2] David A Boas and Andrew K Dunn. “Laser speckle contrast imaging  
482 in biomedical optics”. In: *Journal of biomedical optics* 15.1 (2010),  
483 p. 011109.
- 484 [3] Andrew K Dunn. “Laser speckle contrast imaging of cerebral blood  
485 flow”. In: *Annals of biomedical engineering* 40.2 (2012), pp. 367–377.
- 486 [4] Joseph W Goodman. “Statistical properties of laser speckle patterns”.  
487 In: *Laser speckle and related phenomena*. Springer, 1975, pp. 9–75.
- 488 [5] Joseph W Goodman. *Speckle phenomena in optics: theory and applica-*  
489 *tions*. Roberts and Company Publishers, 2007.

- 490 [6] Wido Heeman et al. “Clinical applications of laser speckle contrast  
491 imaging: a review”. In: *Journal of biomedical optics* 24.8 (2019), p. 080901.
- 492 [7] J David Briers. “Laser speckle contrast imaging for measuring blood  
493 flow”. In: (2007).
- 494 [8] Mitchell A Davis, SM Shams Kazmi, and Andrew K Dunn. “Imaging  
495 depth and multiple scattering in laser speckle contrast imaging”. In:  
496 *Journal of biomedical optics* 19.8 (2014), p. 086001.
- 497 [9] Shuai Yuan et al. “Determination of optimal exposure time for imaging  
498 of blood flow changes with laser speckle contrast imaging”. In: *Applied*  
499 *optics* 44.10 (2005), pp. 1823–1830.
- 500 [10] Pavel Zakharov et al. “Quantitative modeling of laser speckle imaging”.  
501 In: *Optics letters* 31.23 (2006), pp. 3465–3467.
- 502 [11] Donald D Duncan and Sean J Kirkpatrick. “Can laser speckle flowme-  
503 try be made a quantitative tool?” In: *JOSA A* 25.8 (2008), pp. 2088–  
504 2094.
- 505 [12] David Briers et al. “Laser speckle contrast imaging: theoretical and  
506 practical limitations”. In: *Journal of biomedical optics* 18.6 (2013),  
507 p. 066018.
- 508 [13] Hao Li et al. “Directly measuring absolute flow speed by frequency-  
509 domain laser speckle imaging”. In: *Optics express* 22.17 (2014), pp. 21079–  
510 21087.
- 511 [14] Annemarie Nadort et al. “Quantitative blood flow velocity imaging  
512 using laser speckle flowmetry”. In: *Scientific reports* 6.1 (2016), pp. 1–  
513 10.
- 514 [15] J Buijs, J van der Gucht, and J Sprakel. “Fourier transforms for fast and  
515 quantitative Laser Speckle Imaging”. In: *Scientific reports* 9.1 (2019),  
516 pp. 1–9.
- 517 [16] J David Briers and S Webster. “Quasi real-time digital version of single-  
518 exposure speckle photography for full-field monitoring of velocity or  
519 flow fields”. In: *Optics communications* 116.1-3 (1995), pp. 36–42.
- 520 [17] J David Briers and Sian Webster. “Laser speckle contrast analysis  
521 (LASCA): a non-scanning, full-field technique for monitoring capillary  
522 blood flow”. In: *Journal of biomedical optics* 1.2 (1996), pp. 174–180.

- 523 [18] Andrew K Dunn et al. “Dynamic imaging of cerebral blood flow using  
524 laser speckle”. In: *Journal of Cerebral Blood Flow & Metabolism* 21.3  
525 (2001), pp. 195–201.
- 526 [19] Ashwin B Parthasarathy et al. “Laser speckle contrast imaging of cere-  
527 bral blood flow in humans during neurosurgery: a pilot clinical study”.  
528 In: *Journal of biomedical optics* 15.6 (2010), p. 066030.
- 529 [20] Lisa M Richards et al. “Intraoperative laser speckle contrast imag-  
530 ing for monitoring cerebral blood flow: results from a 10-patient pilot  
531 study”. In: *Photonic Therapeutics and Diagnostics VIII*. Vol. 8207. In-  
532 ternational Society for Optics and Photonics, p. 82074L.
- 533 [21] SM Shams Kazmi et al. “Expanding applications, accuracy, and in-  
534 terpretation of laser speckle contrast imaging of cerebral blood flow”.  
535 In: *Journal of Cerebral Blood Flow Metabolism* 35.7 (2015), pp. 1076–  
536 1084.
- 537 [22] Ashwin B Parthasarathy et al. “Robust flow measurement with multi-  
538 exposure speckle imaging”. In: *Optics express* 16.3 (2008), pp. 1975–  
539 1989.
- 540 [23] Syed Mohammad Shams Kazmi et al. “Chronic imaging of cortical  
541 blood flow using Multi-Exposure Speckle Imaging”. In: *Journal of Cere-  
542 bral Blood Flow Metabolism* 33.6 (2013), pp. 798–808.
- 543 [24] SM Shams Kazmi, Satyajit Balial, and Andrew K Dunn. “Optimization  
544 of camera exposure durations for multi-exposure speckle imaging of the  
545 microcirculation”. In: *Biomedical optics express* 5.7 (2014), pp. 2157–  
546 2171.
- 547 [25] Dmitry D Postnov et al. “Dynamic light scattering imaging”. In: *Sci-  
548 ence advances* 6.45 (2020), eabc4628.
- 549 [26] SM Shams Kazmi et al. “Flux or speed? Examining speckle contrast  
550 imaging of vascular flows”. In: *Biomedical optics express* 6.7 (2015),  
551 pp. 2588–2608.
- 552 [27] Ingemar Fredriksson and Marcus Larsson. “Vessel packaging effect in  
553 laser speckle contrast imaging and laser Doppler imaging”. In: *Journal  
554 of Biomedical Optics* 22.10 (2017), p. 106005.
- 555 [28] Chakameh Z. Jafari et al. “Effect of vascular structure on laser speckle  
556 contrast imaging”. In: *Biomedical Optics Express* 11.10 (2020), pp. 5826–  
557 5841.

- 558 [29] Bruce J Berne and Robert Pecora. *Dynamic light scattering: with appli-*  
559 *cations to chemistry, biology, and physics*. Courier Corporation, 2000.
- 560 [30] Dave J Pine et al. “Diffusing-wave spectroscopy: dynamic light scat-
- 561 *tering in the multiple scattering limit*”. In: *Journal de Physique* 51.18  
562 (1990), pp. 2101–2127.
- 563 [31] Ranjini Bandyopadhyay et al. “Speckle-visibility spectroscopy: A tool  
564 to study time-varying dynamics”. In: *Review of scientific instruments*  
565 76.9 (2005), p. 093110.
- 566 [32] Pavel Zakharov and Frank Scheffold. “Advances in dynamic light scat-
- 567 *tering techniques*”. In: *Light Scattering Reviews 4*. Springer, 2009, pp. 433–  
568 467.
- 569 [33] Mitchell A Davis et al. “Sensitivity of laser speckle contrast imaging  
570 to flow perturbations in the cortex”. In: *Biomedical optics express* 7.3  
571 (2016), pp. 759–775.
- 572 [34] Mitchell A Davis and Andrew K Dunn. “Dynamic light scattering  
573 Monte Carlo: a method for simulating time-varying dynamics for or-
- 574 *dered motion in heterogeneous media*”. In: *Optics express* 23.13 (2015),  
575 pp. 17145–17155.
- 576 [35] David A Boas and Arjun G Yodh. “Spatially varying dynamical proper-
- 577 *ties of turbid media probed with diffusing temporal light correlation*”.  
578 In: *JOSA A* 14.1 (1997), pp. 192–215.
- 579 [36] Tongcang Li et al. “Measurement of the instantaneous velocity of a  
580 Brownian particle”. In: *Science* 328.5986 (2010), pp. 1673–1675.
- 581 [37] Ingemar Fredriksson, Carina Fors, and Johannes Johansson. “Laser  
582 doppler flowmetry—a theoretical framework”. In: *Department of Biomed-*  
583 *ical Engineering, Linköping University* (2007), pp. 6–7.
- 584 [38] Dilleys Ferreira et al. “Connecting field and intensity correlations: The  
585 Siegert relation and how to test it”. In: *American Journal of Physics*  
586 88.10 (2020), pp. 831–837.
- 587 [39] David A Boas et al. “Establishing the diffuse correlation spectroscopy  
588 signal relationship with blood flow”. In: *Neurophotonics* 3.3 (2016),  
589 p. 031412.
- 590 [40] Samuel A Mihelic et al. “Segmentation-Less, Automated, Vascular Vec-
- 591 *torization*”. In: *PLOS Computational Biology* 17.10 (2021), e1009451.



- 592 [41] Blender Online Community. *Blender - a 3D modelling and rendering*  
593 *package*. Blender Foundation. Stichting Blender Foundation, Amster-  
594 dam, 2018.
- 595 [42] Annie Zhou et al. “Evaluation of resonant scanning as a high-speed  
596 imaging technique for two-photon imaging of cortical vasculature”. In:  
597 *Biomedical Optics Express* 13.3 (2022), pp. 1374–1385.
- 598 [43] Shaun A Engelmann et al. “Diamond Raman laser and yb fiber ampli-  
599 fier for in vivo multiphoton fluorescence microscopy”. In: *Biomedical*  
600 *Optics Express* 13.4 (2022), pp. 1888–1898.
- 601 [44] Vinayakrishnan Rajan et al. “Review of methodological developments  
602 in laser Doppler flowmetry”. In: *Lasers in medical science* 24.2 (2009),  
603 pp. 269–283.
